# Supplementary material
Source: PubMed Central journal article supplement (PMC4397395)
Supplement: npp2014321x3.pdf [file npp2014321x3.pdf]

**Supplemental Data Table 1**

**Characteristics of Control Subjects and Subjects with Major Depressive Disorder (MDD)**

**A. Control Subjects**

| Subjects | Age/gender/race | Duration of illness (yrs) | PMI (hrs) | pH        | Prescribed Medications                                                    | Toxicology | Smoker | Storage time (yrs) |
|----------|-----------------|---------------------------|-----------|-----------|---------------------------------------------------------------------------|------------|--------|--------------------|
| C1       | 26/M/AA         | NA                        | 13        | 6.66      | None                                                                      | ND         | No     | 15                 |
| C2       | 42/M/C          | NA                        | 20        | 6.82      | None                                                                      | ND         | No     | 13                 |
| C3       | 44/M/C          | NA                        | 28        | 6.63      | metoprolol                                                                | ND         | Yes    | 7                  |
| C4       | 32/M/C          | NA                        | 25        | 6.88      | PREDNISONE,<br>AZATHIOPRINE<br>METRONIDAZOL<br>E<br>MESALAMINE<br>LOMOTIL | ND         | No     | 7                  |
| C5       | 62/F/C          | NA                        | 27.5      | 6.34      | None                                                                      | ND         | No     | 16                 |
| C6       | 45/F/AA         | NA                        | 9         | 6.86      | None                                                                      | ND         | Yes    | 15                 |
| C7       | 50/F/C          | NA                        | 27        | 6.74      | None                                                                      | ND         | Yes    | 12                 |
| C8       | 38/F/AA         | NA                        | 11        | 6.46      | diltiazem, albuterol,<br>prednisone                                       | CO         | Yes    | 11                 |
| C9       | 49/M/C          | NA                        | 10        | 6.71      | None                                                                      | CO         | Yes    | 7                  |
| C10      | 65/F/C          | NA                        | 26        | 6.18      | amlopidine,<br>metoprolol                                                 | ND         | No     | 8                  |
| C11      | 44/F/AA         | NA                        | 32        | 6.72      | None                                                                      | lidocaine  | No     | 9                  |
| C12      | 80/F/C          | NA                        | 6.15      | 5.65      | None                                                                      | ND         | No     | 19                 |
| C13      | 69/M/AA         | NA                        | 15        | 6.49      | None                                                                      | ND         | No     | 11                 |
| C14      | 54/M/AA         | NA                        | 19        | 6.525     | digoxin,<br>dipyridamole                                                  | ND         | No     | 15                 |
| C15      | 33/M/C          | NA                        | 23        | 6.86      | None                                                                      | ND         | Yes    | 12                 |
| C16      | 47/M/AA         | NA                        | 27        | 6.09      | None                                                                      | EtOH       | Yes    | 11                 |
| C17      | 46/M/AA         | NA                        | 11        | 6.95      | None                                                                      | ND         | No     | 11                 |
| C18      | 67/M/C          | NA                        | 24        | 6.96      | None                                                                      | ND         | Yes    | 11                 |
| Mean     | Age: 49.6±3.4   |                           | 19.6±1.9  | 6.58±0.08 |                                                                           |            |        | 11.7±3.4           |

### B. Subjects with Major Depressive Disorder (MDD)

| Subjects | Age/gender/race | Duration of illness (yrs) | PMI (hrs) | pH        | Prescribed Medications                                       | Toxicology                   | Smoker | Storage time (yrs) | Age of onset |
|----------|-----------------|---------------------------|-----------|-----------|--------------------------------------------------------------|------------------------------|--------|--------------------|--------------|
| MDD1     | 41/M/C          | 3                         | 19.23     | 6.24      | Possibly analgesics with codeine, chlorpheniramine           | chlorpheniramine             | Yes    | 9                  | ~ 38         |
| MDD2     | 43/M/C          | 15                        | 21        | 6.73      | None                                                         | ND                           | No     | 17                 | 28           |
| MDD3     | 47/M/C          | 20                        | 11        | 6.84      | None                                                         | EtOH                         | No     | 17                 | 27           |
| MDD4     | 62/M/C          | 3                         | 20.2      | 6.47      | bupirone, lorazepam                                          | ND                           | Yes    | 19                 | 59           |
| MDD5     | 62/M/AA         | 3-27                      | 22        | 6.1       | None                                                         | ND                           | Yes    | 5                  | 35           |
| MDD6     | 68/M/C          | NA                        | 4         | 6.21      | None                                                         | CO                           | No     | 18                 | NA           |
| MDD7     | 80/M/C          | 0.4                       | 21        | 6.67      | None                                                         | ND                           | Yes    | 11                 | 80           |
| MDD8     | 78/F/C          | 15                        | 25        | 6.94      | lorazepam                                                    | ND                           | No     | 15                 | 63           |
| MDD9     | 81/F/C          | 2                         | 29        | 6.695     | None                                                         | ND                           | No     | 11                 | 79           |
| MDD10    | 83/F/C          | 4                         | 21        | 6.32      | TEMAZEPAM                                                    | ND                           | No     | 19                 | 79           |
| MDD11    | 46/M/AA         | 0.8                       | 17        | 6.26      | None                                                         | ND                           | No     | 15                 | 45           |
| MDD12    | 37/M/AA         | 1                         | 31.5      | 6.7       | None                                                         | EtOH                         | No     | 5                  | 37           |
| MDD13    | 38/F/C          | 5                         | 12        | 6.41      | SERTRALINE, DICYCLOMINE, TEMAZEPAM, diazepam                 | diazepam, temazepam          | No     | 18                 | 33           |
| MDD14    | 36/F/AA         | 1                         | 25        | 6.84      | None                                                         | ND                           | Yes    | 13                 | 35           |
| MDD15    | 77/F/C          | 34                        | 32        | 6.79      | THIORIDAZINE, TRAZEDONE, VENLAFAXINE, diazepam, CLONAZEPAM   | ND                           | No     | 16                 | 27           |
| MDD16    | 54/M/C          | 3                         | 23        | 6.24      | SERTRALINE, phenytoin, mysoline, protriptyline, perphenazine | CO, phenobarbital, phenytoin | Yes    | 15                 | 39           |
| MDD17    | 20/M/C          | 1                         | 20        | 6.7       | None                                                         | diphenhydramine              | No     | 4                  | 51           |
| MDD18    | 30/M/AA         | 3                         | 18        | 6.91      | None                                                         | EtOH                         | Yes    | 16                 | 20           |
| Mean     | Age: 54.6±4.7   |                           | 20.7±1.6  | 6.56±0.06 |                                                              |                              |        | 13.5±1.2           |              |

### C. Diagnosis of Subjects with Major Depressive Disorder (MDD)

| Subjects | Duration of illness (yrs) | Episode number | Episode duration (yrs) | Age of Onset |
|----------|---------------------------|----------------|------------------------|--------------|
| MDD1     | 3                         | 1              | 3                      | ~ 38         |
| MDD2     | 15                        | 2 to 3         | 0.06                   | 28           |
| MDD3     | 20                        | 3              | 6                      | 27           |
| MDD4     | 3                         | 1              | 3                      | 59           |
| MDD5     | 13                        | multiple       | 3                      | 39           |
| MDD6     | NA                        | 1              | NA                     | NA           |
| MDD7     | 0.4                       | 1              | 0.4                    | 80           |
| MDD8     | 15                        | 1              | 15                     | 63           |
| MDD9     | 2                         | 1              | 4                      | 79           |
| MDD10    | 4                         | 2              | 2                      | 79           |
| MDD11    | 0.8                       | 1              | .08                    | 45           |
| MDD12    | 1                         | 1              | 1                      | 37           |
| MDD13    | 5                         | 2 to 3         | 2                      | 33           |
| MDD14    | 1                         | 1              | 1                      | 35           |
| MDD15    | 34                        | multiple       | 2                      | 27           |
| MDD16    | 3                         | 1              | 3                      | 39           |
| MDD17    | 1                         | 1              | 1                      | 51           |
| MDD18    | 3                         | 1              | 3                      | 20           |

Eighteen subjects were diagnosed with major depressive disorder (MDD) at the time of death according to the Diagnostic and Statistical Manual of Mental Disorders (DSM-IV) (American Psychiatric Association, 1995). Eighteen control subjects were assessed and diagnosed as psychiatrically normal. Additional information on subjects was gathered from medical records and coroner's records (including cause of death and toxicology reports). The toxicology reports revealed that the subjects with MDD were not treated with antidepressant medications immediately prior to death.

Medications listed under Prescribed Medications that are in upper case signify that the patient received the prescription within the last month of life; lowercase medications refer to other prescriptions the patient received during their lifetime prior to the last month of life.

AA, African American; C, Caucasian; F, female; M, male; NA, not available; PMI, postmortem interval (hours), defined as the time between death and freezing of the tissues; ND, nothing detected; CO, carbon monoxide; EtOH, ethanol level in blood.
